# Supplementary material
Source: publisher figshare collection journal article supplement (https://acs.figshare.com/ndownloader/files/5067235)
Supplement: Supplementary file 1 [file 5067235]

## **Supporting Information**

### **Local Feedback Mode of Scanning Electrochemical Microscopy for Electrochemical Characterization of One-Dimensional Nanostructure: Theory and Experiment with Nanoband Electrode as Model Substrate**

Hui Xiong, Darrick A. Gross, Jidong Guo, and Shigeru Amemiya\*

*Department of Chemistry, University of Pittsburgh*

*219 Parkman Avenue, Pittsburgh, Pennsylvania, 15260*

\* To whom correspondence should be addressed. E-mail: amemiya@pitt.edu. Fax: 412-624-5259.

Submitted to Anal. Chem. on December 28, 2005

Nanoband electrodes were characterized using cyclic voltammetry (Figure S1). The forward and reverse sweep voltammograms overlap and give slightly peak-shaped waves. The voltammograms fit well with a theoretical diffusion-limited voltammogram given by<sup>1</sup>

$$i = \frac{nFc_0Dl[0.97 - 0.11\exp\{-9.9/\ln(5(\xi + 1)p^{-2})\}]}{1 + \exp(-\xi)} \quad (\text{S1})$$

with

$$p = (nFv\omega^2/RTD)^{1/2} \quad (\text{S2})$$

$$\xi = (nF/RT)(E - E^{0'}) \quad (\text{S3})$$

where  $v$  is the potential sweep rate and  $E^{0'}$  is the formal potential. With  $D = 8 \times 10^{-6} \text{ cm}^2/\text{s}$ ,  $w = 100 \text{ nm}$ , and  $v = 0.010 \text{ V/s}$ , the band length of  $2.6 \text{ cm}$  was obtained, which agree with the physical length, confirming that the redox reaction at the narrow band surface is diffusion-limited.

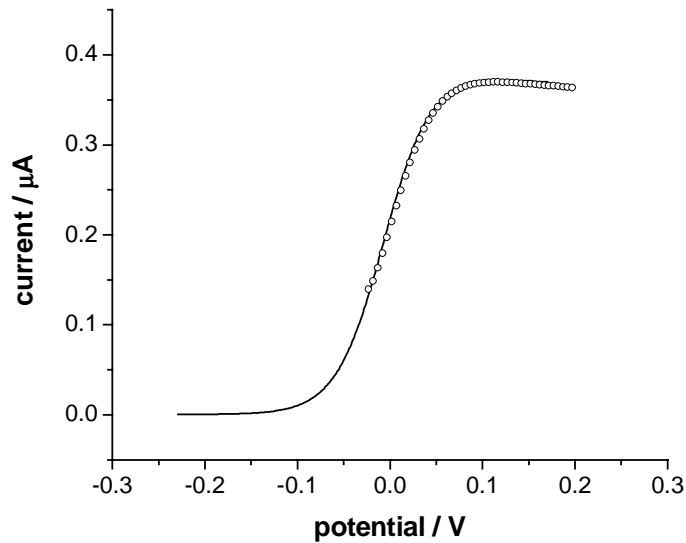

**Figure S1.** Cyclic voltammograms at a nanoband electrode in 5 mM  $\text{Ru}(\text{NH}_3)_6\text{Cl}_3$  with 0.1 M KCl. The solid line is an experimental response and the circles were obtained using eq S1.

In line scan experiments with a 25  $\mu\text{m}$ -diameter Pt disk probe ( $\text{RG} = 10$ ), ascorbic acid was used as an irreversible redox molecule, which gives a negative feedback effect both at conductive and insulating substrates. The tip current based on oxidation of ascorbic acid at the 25  $\mu\text{m}$ -diameter decreases as the tip is brought to a 2 mm-diameter Pt substrate (Figure S2), resulting in an approach curve that fits with a theoretical curve with an insulating substrate. This result is not due to fouling of the Pt substrate surface by products of the oxidation reaction, where a positive feedback effect was observed using  $\text{Ru}(\text{NH}_3)_6^{3+}$  as a reversible mediator. Similarly, positive and negative feedback effects were observed at the Pt substrate using a 10  $\mu\text{m}$ -diameter Pt disk probe with the respective redox molecules.

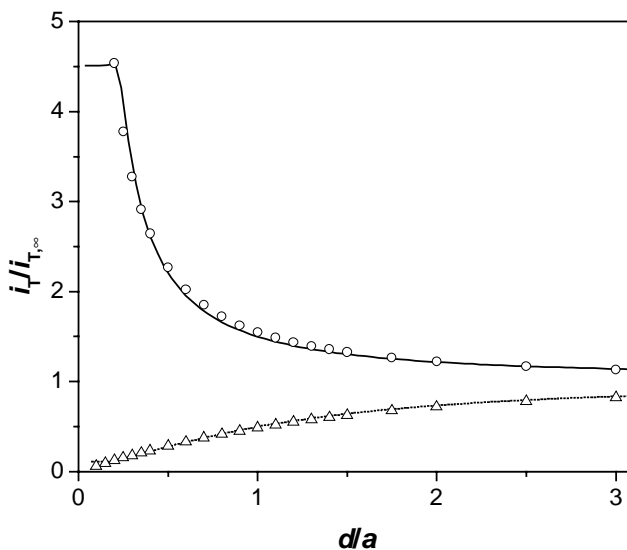

**Figure S2.** SECM approach curves at a 2 mm-diameter Pt substrate obtained using a 25  $\mu\text{m}$ -diameter Pt disk probe with  $\text{Ru}(\text{NH}_3)_6^{3+}$  (solid line) and ascorbic acid (dotted line) as a redox-active molecule in their mixed solution. The circles and triangles represent theoretical approach curves with a conductor and an insulator, respectively.

## REFERENCES

- (1) Aoki, K.; Tokuda, K. *J. Electroanal. Chem.* **1987**, 237, 163-170.
